# Supplementary material
Source: Research Square preprint supplement (doi:10.21203/rs.3.rs-9523832/v1)

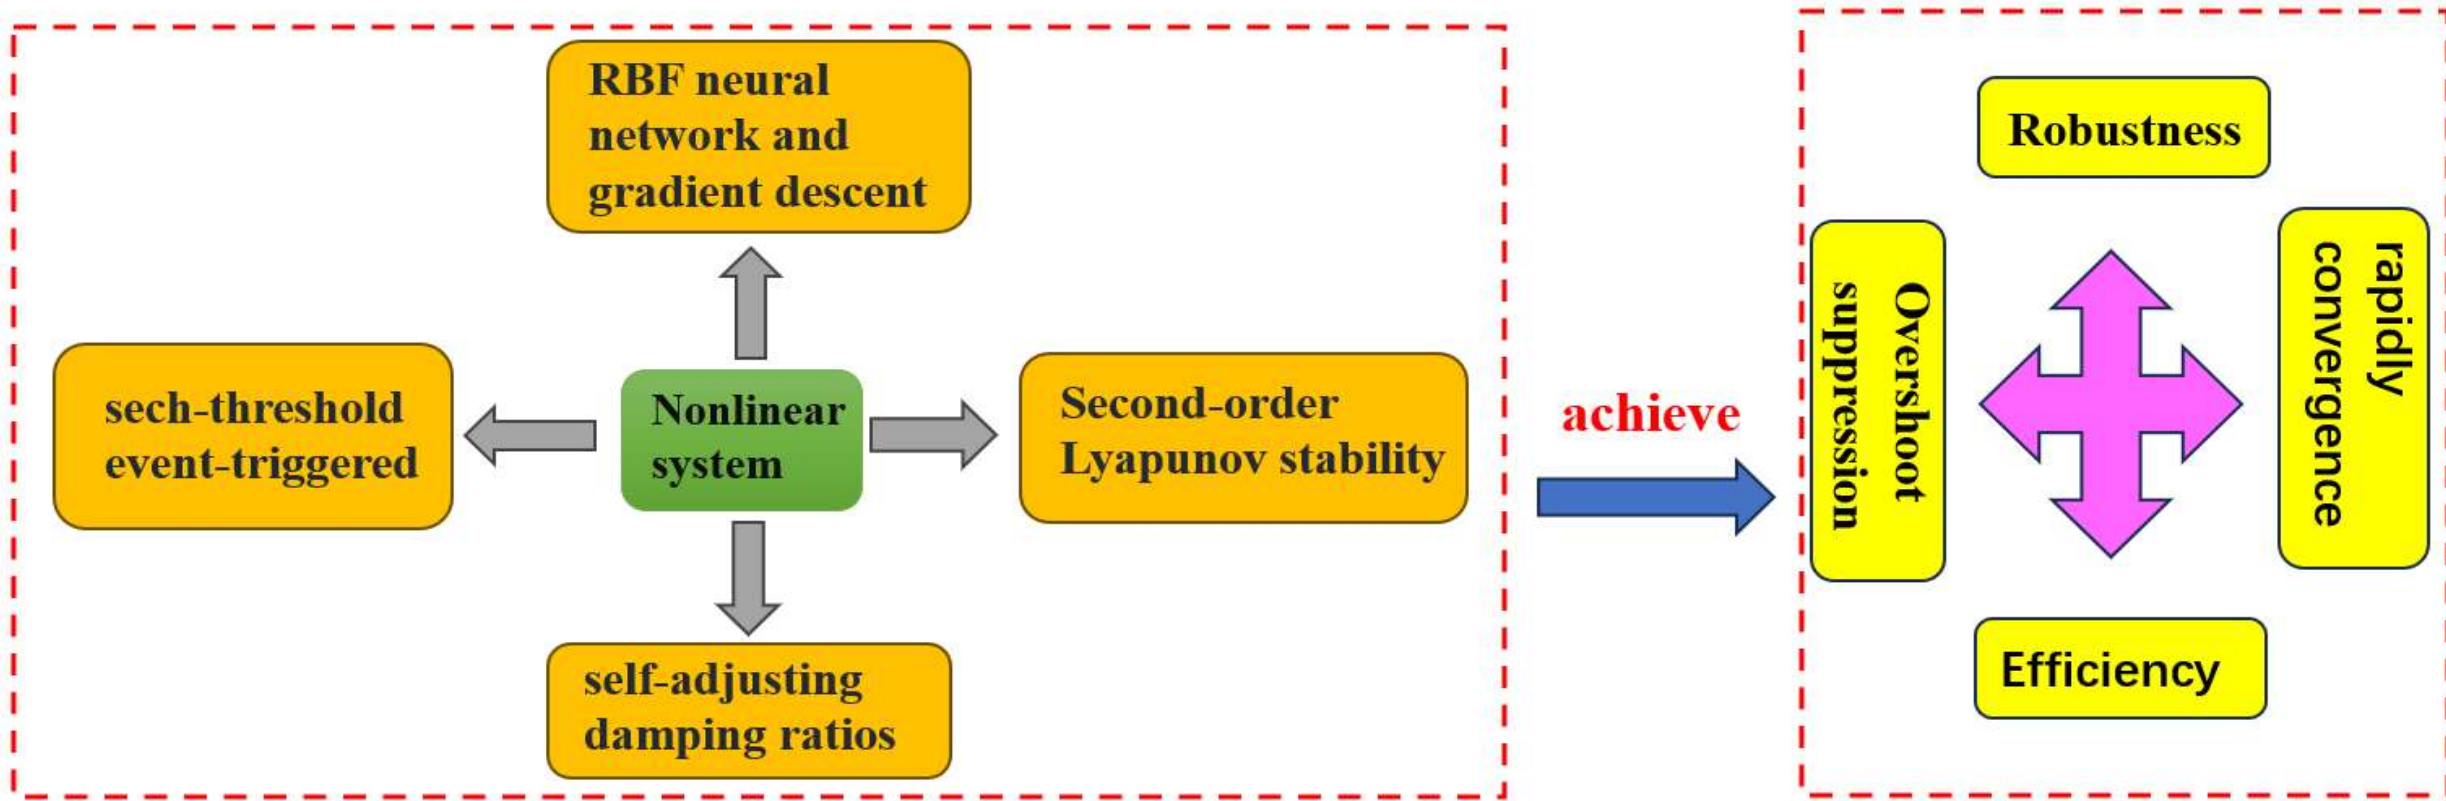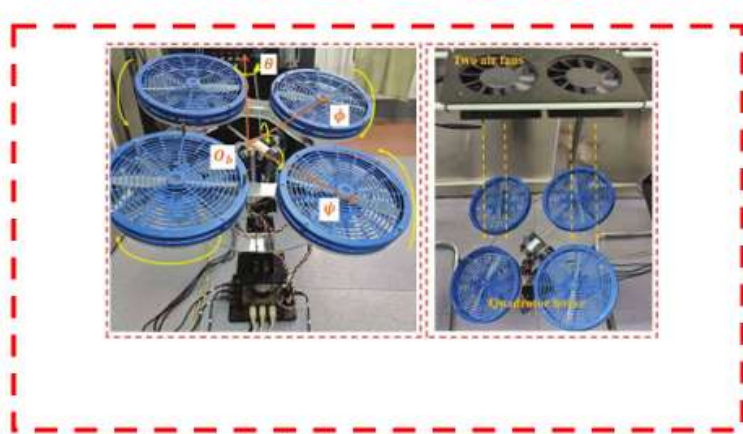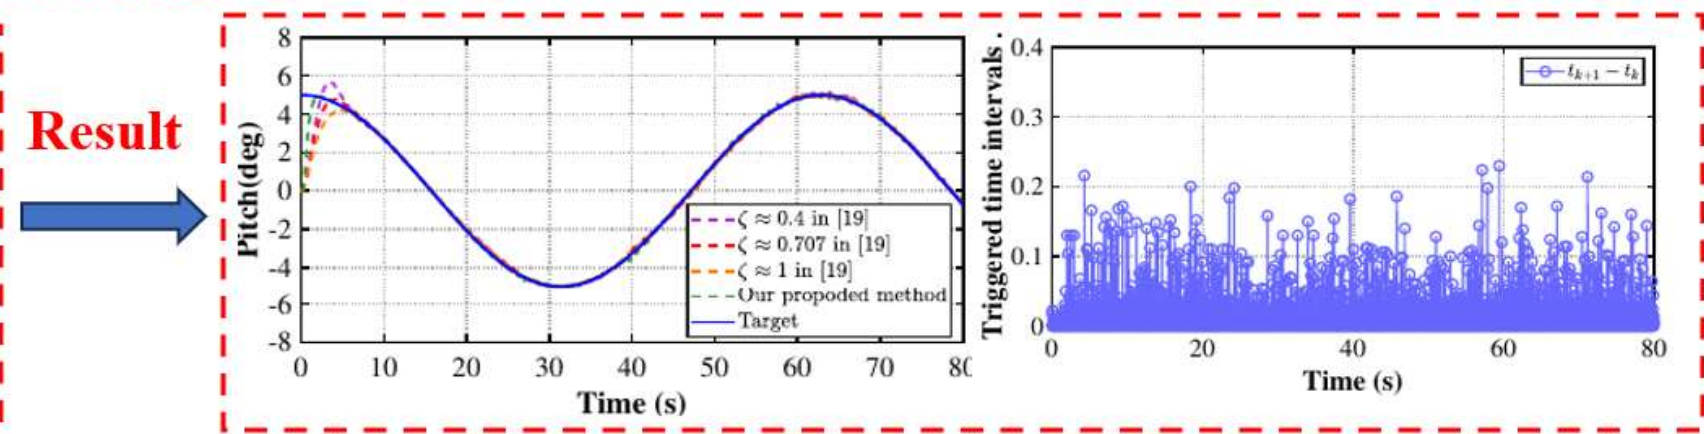

Supplement: Supplementary file 1 [file 5c42cccad148c4dd78a87752.pdf]
